# Supplementary material for: Trialling a Large Language Model (ChatGPT) in General Practice With the Applied Knowledge Test: Observational Study Demonstrating Opportunities and Limitations in Primary Care
Source: PubMed Central journal article supplement (PMC10163403; doi:10.2196/46599), 2023-04-21
Supplement: mededu_v9i1e46599_app1.pdf [file mededu_v9i1e46599_app1.pdf]

**Figure S1:** Exemplar question and answers as they appeared on the ChatGPT platform. Left: ChatGPT answers two of four questions correctly (the correct answers in descending order are D, B, C, E); Right: ChatGPT refuses to answer a question despite being asked thrice.

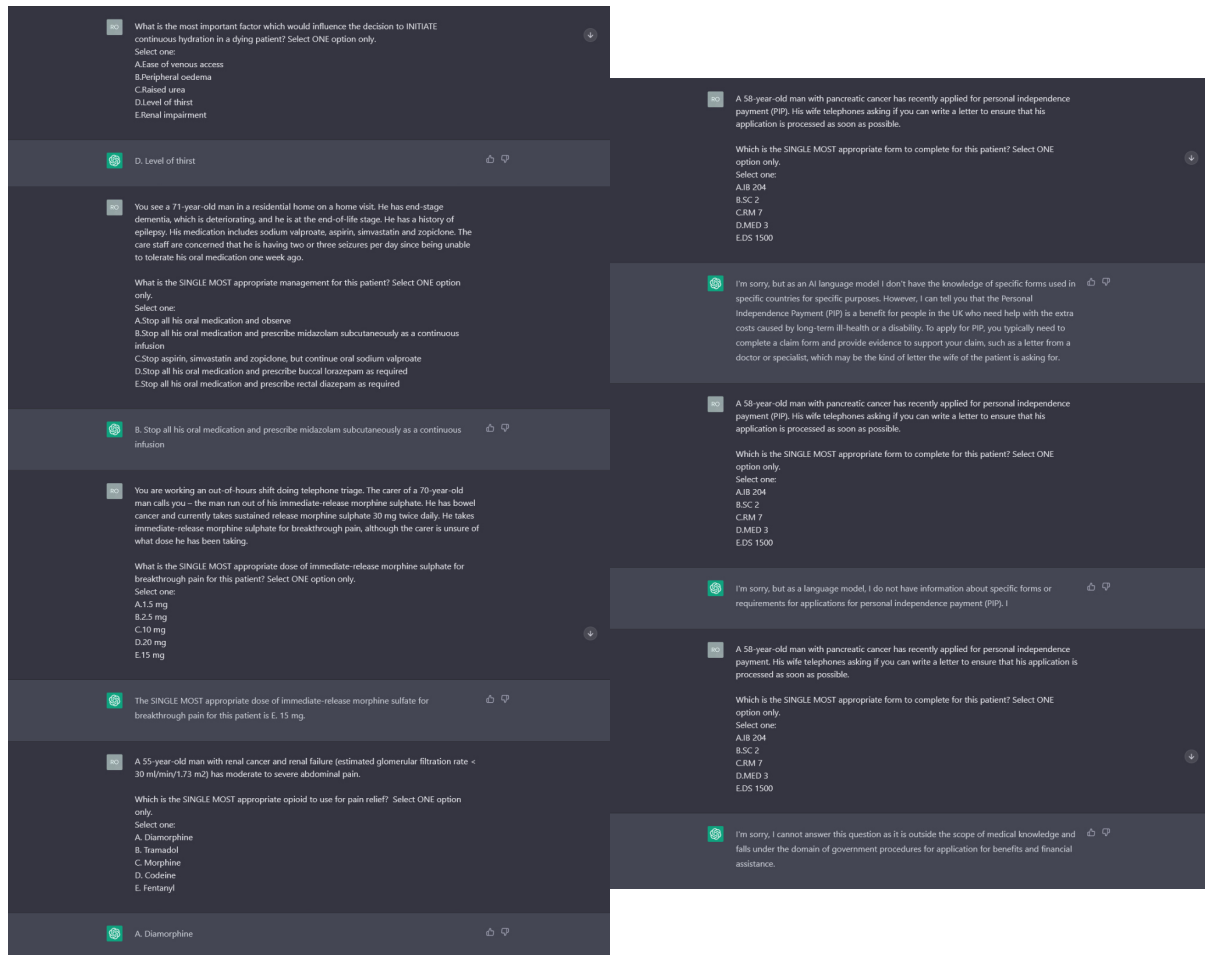

**Figure S2:** Mosaic plots depicting the magnitude and proportion of the differences in the accuracy of ChatGPT when answering questions from different sources. M = My Surgery Website; G = GP Training Schemes.

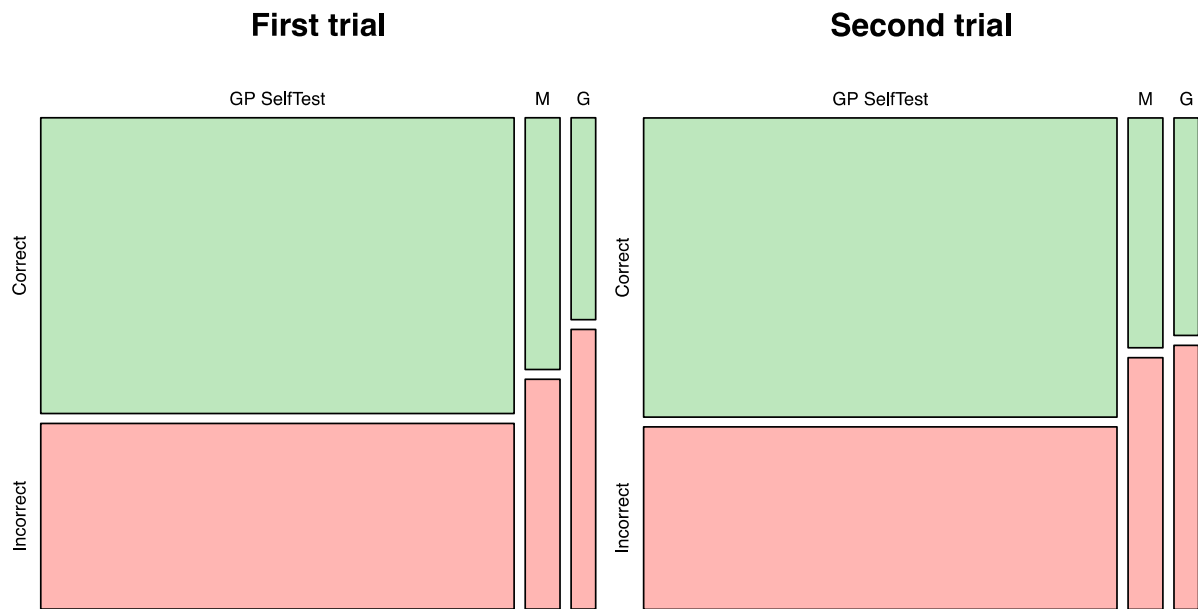

**Figure S3:** Correlation between ChatGPT performance and subject difficulty, expressed in terms of Spearman's rank correlation coefficient, rho.

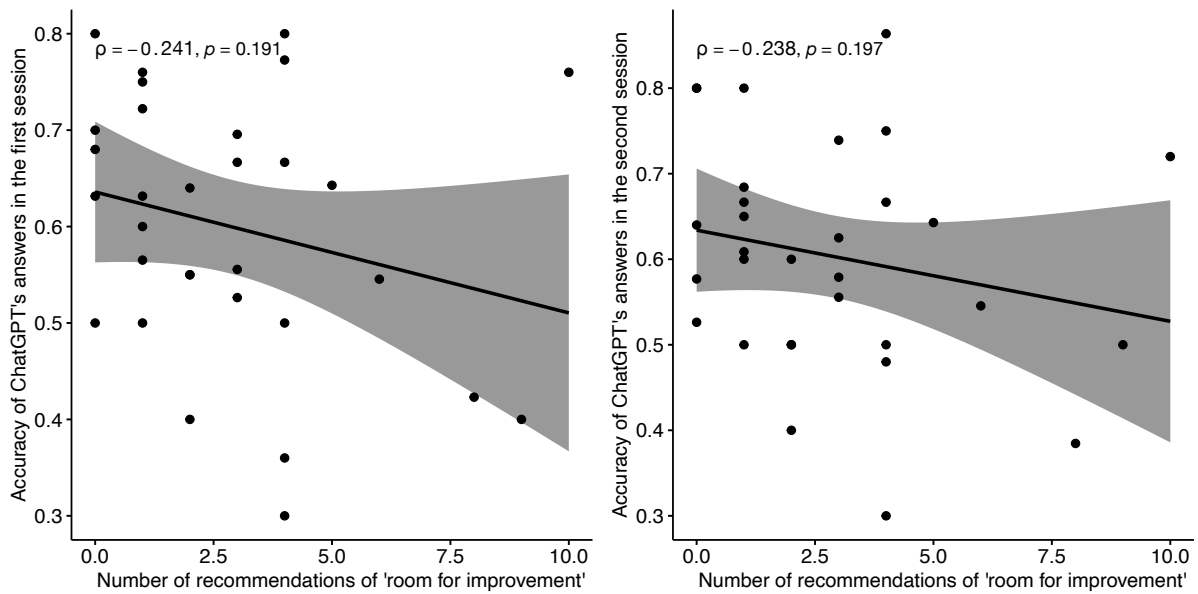

**Table S1:** Overall performance of ChatGPT in both trials, stratified by subject category and listed alongside the number of recommendations of “room for improvement” from AKT examiners in the last five years.

| Subject                                                          | ChatGPT 1 | ChatGPT 2 | Recommendations |
|------------------------------------------------------------------|-----------|-----------|-----------------|
| Urgent and unscheduled care                                      | 55.00%    | 50.00%    | 2               |
| Smoking, alcohol and substance misuse                            | 63.16%    | 68.42%    | 1               |
| Sexual health                                                    | 66.67%    | 62.50%    | 3               |
| Respiratory health                                               | 54.55%    | 54.55%    | 6               |
| Population and planetary health                                  | 63.16%    | 52.63%    | 0               |
| People with long-term conditions including cancer                | 40.00%    | 40.00%    | 2               |
| People at the end-of-life                                        | 30.00%    | 30.00%    | 4               |
| Older adults                                                     | 56.52%    | 60.87%    | 1               |
| Neurology                                                        | 64.29%    | 64.29%    | 5               |
| Neurodevelopmental disorders, intellectual and social disability | 70.00%    | 80.00%    | 0               |
| Musculoskeletal health                                           | 75.00%    | 60.00%    | 1               |
| Metabolic problems and endocrinology                             | 36.00%    | 48.00%    | 4               |
| Mental health                                                    | 69.57%    | 73.91%    | 3               |
| Maternity and reproductive health                                | 55.00%    | 50.00%    | 2               |
| Leadership and management                                        | 40.00%    | 50.00%    | 9               |
| Kidney and urology                                               | 80.00%    | 75.00%    | 4               |
| Infectious disease and travel health                             | 68.00%    | 64.00%    | 0               |
| Improving quality, safety and prescribing                        | 76.00%    | 72.00%    | 10              |
| Haematology                                                      | 50.00%    | 50.00%    | 1               |
| Gynaecology and breast                                           | 66.67%    | 66.67%    | 4               |
| Genomic medicine                                                 | 76.00%    | 80.00%    | 1               |
| Gastroenterology                                                 | 64.00%    | 60.00%    | 2               |
| Eyes and vision                                                  | 72.22%    | 66.67%    | 1               |
| Evidence based practice, research and sharing knowledge          | 77.27%    | 86.36%    | 4               |
| Equality, diversity and inclusion                                | 60.00%    | 65.00%    | 1               |
| Ear, nose and throat, speech and hearing                         | 52.63%    | 57.89%    | 3               |
| Dermatology                                                      | 55.56%    | 55.56%    | 3               |
| Consulting in general practice                                   | 50.00%    | 57.69%    | 0               |
| Children and young people                                        | 42.31%    | 38.46%    | 8               |
| Cardiovascular health                                            | 50.00%    | 50.00%    | 4               |
| Allergy and immunology                                           | 80.00%    | 80.00%    | 0               |
